# Supplementary material for: The Effect of Phenyl Content on the Liquid Crystal-Based Organosilicone Elastomers with Mechanical Adaptability
Source: MDPI journal article supplement (doi:10.3390/polym14050903), 2022-02-24
Supplement: s1 [file s1]

# The Effect of Phenyl Content on the Liquid Crystal-Based Organosilicone Elastomers with Mechanical Adaptability

Zhe Liu, Hua Wang and Chuanjian Zhou \*

School of Materials Science and Engineering, Shandong University, Jinan 250061, China.  
201820362@mail.sdu.edu.cn (Z.L.); hwang@sdu.edu.cn (H.W.)

\* Correspondence: zhouchuanjian@sdu.edu.cn

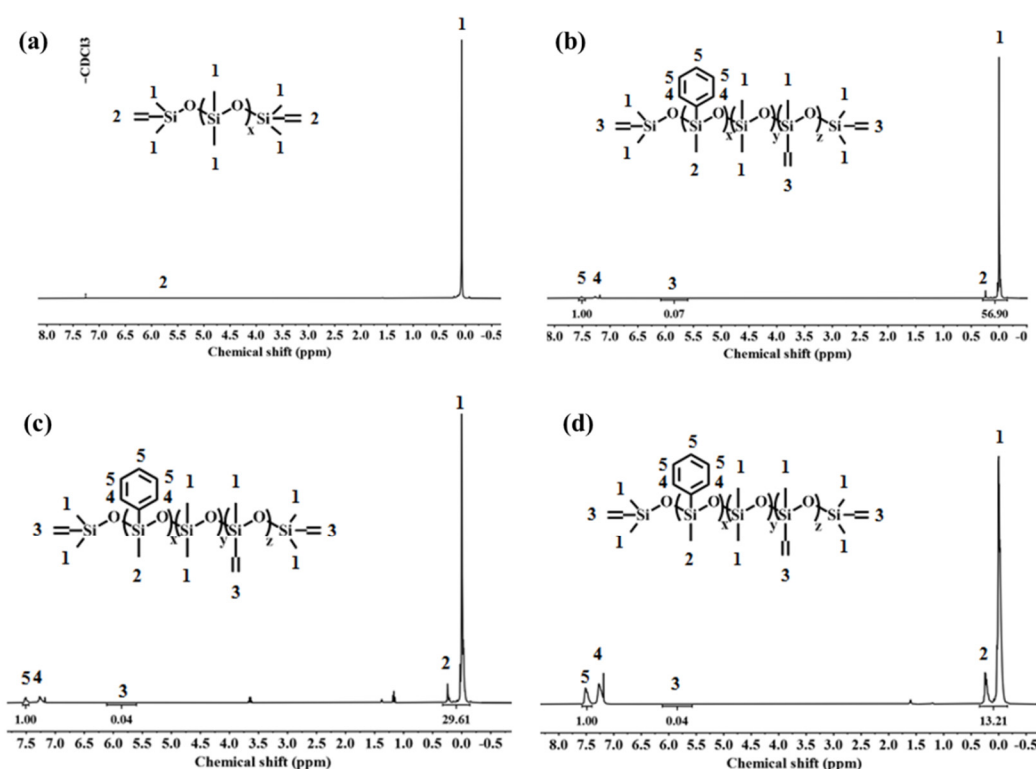

**Figure S1.**  $^1\text{H}$  NMR spectra of (a) Silicone oil with 0% phenyl content; (b) Silicone oil with 5% phenyl content; (c) Silicone oil with 10% phenyl content ; (d) Silicone oil with 20% phenyl content.
